# Supplementary material for: Inhibition of eNOS Partially Blunts the Beneficial Effects of Nebivolol on Angiotensin II-Induced Signaling in H9c2 Cardiomyoblasts
Source: MDPI journal article supplement (doi:10.3390/cimb44050144), 2022-05-10
Supplement: s1 [file s1]

# Inhibition of eNOS Partially Blunts the Beneficial Effects of Nebivolol on Angiotensin II-Induced Signaling in H9c2 Cardiomyoblasts

Rukhsana Gul <sup>1, \*</sup>, Nouf Alsalman <sup>1</sup> and Assim A. Alfadda <sup>1,2,3</sup>

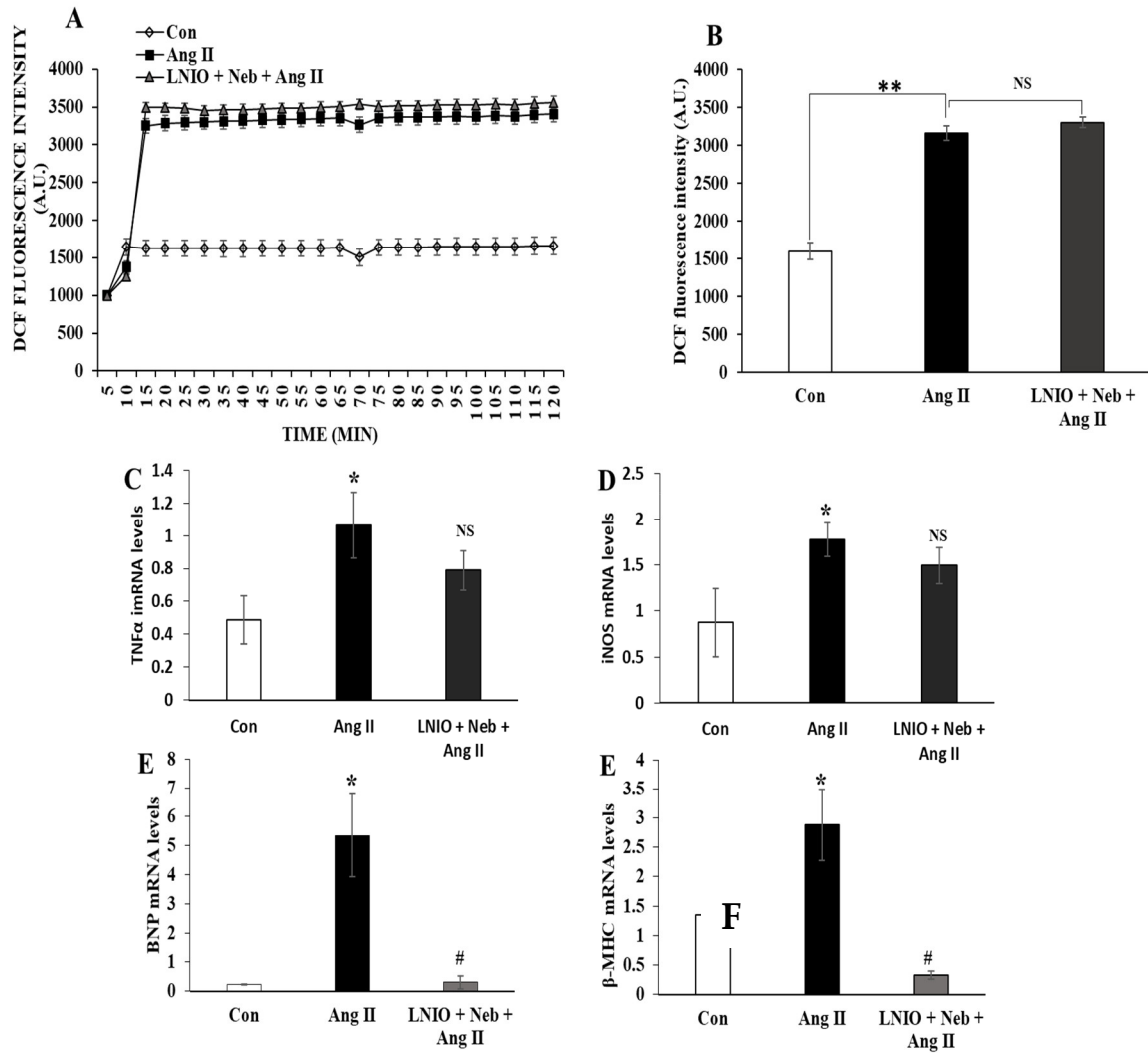

**Figure S1.** Effects of LNIO and nebivolol combination on ANG II-induced ROS generation and mRNA expression of hypertrophy and inflammatory genes. ANG II, induced increase in DCFDA fluorescence was not affected by pretreatment with LNIO plus Neb (A, B). ANG II-mediated mRNA expression levels of proinflammatory cytokines TNF- $\alpha$  (C) and iNOS (D) were not reduced by LNIO plus Neb pretreatment. ANG II-mediated mRNA expression of hypertrophy markers BNP (E) and  $\beta$ -MHC (F) were significantly reduced by LNIO plus Neb pretreatment. \*\* $P < 0.02$ , \* $P < 0.05$  vs. untreated (Con), # $P < 0.05$  vs. ANG II and NS, nonsignificant vs. ANG II. Values are means  $\pm$  SEM  $N \geq 6$  for each treatment group
